# Supplementary material for: Serotonin reduction in post-acute sequelae of viral infection
Source: PubMed Central journal article supplement — Cell. Author manuscript; Available in PMC 2024 Jul 6. (PMC11227373; doi:10.1016/j.cell.2023.09.013), 2023-10-16
Supplement: NIHMS1937987-supplement-MMC1.pdf [file NIHMS1937987-supplement-MMC1.pdf]

## Supplemental information

### Serotonin reduction in post-acute sequelae of viral infection

Andrea C. Wong, Ashwarya S. Devason, Iboro C. Umana, Timothy O. Cox, Lenka Dohnalová, Lev Litichevskiy, Jonathan Perla, Patrick Lundgren, Zienab Etwebi, Luke T. Izzo, Jihee Kim, Monika Tetlak, H  l  ne C. Descamps, Simone L. Park, Stephen Wisser, Aaron D. McKnight, Ryan D. Pardy, Junwon Kim, Niklas Blank, Shaan Patel, Katharina Thum, Sydney Mason, Jean-Christophe Beltra, Micha  l F. Michieletto, Shin Foong Ngiow, Brittany M. Miller, Megan J. Liou, Bhoomi Madhu, Oxana Dmitrieva-Posocco, Alex S. Huber, Peter Hewins, Christopher Petucci, Candice P. Chu, Gwen Baraniecki-Zwil, Leila B. Giron, Amy E. Baxter, Allison R. Greenplate, Charlotte Kearns, Kathleen Montone, Leslie A. Litzky, Michael Feldman, Jorge Henao-Mejia, Boris Striepen, Holly Ramage, Kellie A. Jurado, Kathryn E. Wellen, Una O'Doherty, Mohamed Abdel-Mohsen, Alan L. Landay, Ali Keshavarzian, Timothy J. Henrich, Steven G. Deeks, Michael J. Peluso, Nuala J. Meyer, E. John Wherry, Benjamin A. Abramoff, Sara Cherry, Christoph A. Thaiss, and Maayan Levy

**Table S1. Clinical characteristics of PASC cohort, Related to Figure 1**

|                                                            |                                |              |
|------------------------------------------------------------|--------------------------------|--------------|
| <b>N</b>                                                   |                                | 1540         |
| <b>Age (years; median (IQR))</b>                           |                                | 49 (20.7)    |
| <b>Sex (n (%))</b>                                         | <b>Male</b>                    | 476 (30.1)   |
|                                                            | <b>Female</b>                  | 1023 (66.4)  |
|                                                            | <b>Unknown</b>                 | 41 (2.7)     |
| <b>Race (n (%))</b>                                        | <b>Asian</b>                   | 21 (1.36)    |
|                                                            | <b>Black</b>                   | 225 (14.61)  |
|                                                            | <b>Hispanic/Latino/White</b>   | 23 (1.49)    |
|                                                            | <b>Hispanic/Latino/Black</b>   | 10 (0.65)    |
|                                                            | <b>White</b>                   | 917 (59.55)  |
|                                                            | <b>East Indian</b>             | 1 (0.06)     |
|                                                            | <b>American Indian</b>         | 5 (0.32)     |
|                                                            | <b>Patient declined</b>        | 30 (1.95)    |
|                                                            | <b>Unknown</b>                 | 276 (17.92)  |
|                                                            | <b>Other</b>                   | 32 (2.08)    |
| <b>Ethnicity (n (%))</b>                                   | <b>Hispanic/Latino</b>         | 60 (3.90)    |
|                                                            | <b>Non-Hispanic</b>            | 1263 (82.01) |
|                                                            | <b>Patient declined</b>        | 45 (2.92)    |
|                                                            | <b>Unknown</b>                 | 172 (11.17)  |
| <b>Number of symptoms (Median (IQR))</b>                   |                                | 8 (6)        |
| <b>Hospitalized during acute COVID-19 illness (n (%))</b>  | <b>Nonhospitalized</b>         | 370 (24.03)  |
|                                                            | <b>Hospitalized</b>            | 1094 (71.04) |
|                                                            | <b>Unknown</b>                 | 76 (4.94)    |
| <b>ICU admission during acute COVID-19 illness (n (%))</b> | <b>Not admitted to the ICU</b> | 882 (57.27)  |
|                                                            | <b>Admitted to the ICU</b>     | 107 (6.95)   |
|                                                            | <b>Unknown</b>                 | 551 (35.78)  |

Table S2. Clinical characteristics of acute COVID-19, recovered, and PASC cohorts, Related to Figure 2

|                                                                                                                                                            |                                                   | Acute        |              | Recovered    | PASC         |
|------------------------------------------------------------------------------------------------------------------------------------------------------------|---------------------------------------------------|--------------|--------------|--------------|--------------|
|                                                                                                                                                            |                                                   | Moderate     | Severe       |              |              |
| <b>N</b>                                                                                                                                                   |                                                   | 30           | 30           | 30           | 58           |
| <b>Age (years; median (IQR))</b>                                                                                                                           |                                                   | 58.0 (19.75) | 60.5 (19.75) | 31.0 (25.50) | 45.0 (20.5)  |
| <b>Sex (n (%))</b>                                                                                                                                         | <b>Male</b>                                       | 13 (43.3)    | 20 (66.7)    | 17 (56.7)    | 19 (32.8)    |
|                                                                                                                                                            | <b>Female</b>                                     | (17) 56.7    | 10 (33.3)    | 13 (43.3)    | 39 (67.2)    |
| <b>Race/ethnicity (n (%))</b>                                                                                                                              | <b>Asian</b>                                      | N/A          | N/A          | N/A          | 1 (1.72)     |
|                                                                                                                                                            | <b>Black</b>                                      | N/A          | N/A          | N/A          | 1 (1.72)     |
|                                                                                                                                                            | <b>Hispanic/Latino</b>                            | N/A          | N/A          | N/A          | 0 (0)        |
|                                                                                                                                                            | <b>White</b>                                      | N/A          | N/A          | N/A          | 47 (81.03)   |
|                                                                                                                                                            | <b>Native Hawaiian and Other Pacific Islander</b> | N/A          | N/A          | N/A          | 0 (0)        |
|                                                                                                                                                            | <b>American Indian and/or Alaska Native</b>       | N/A          | N/A          | N/A          | 0 (0)        |
|                                                                                                                                                            | <b>Two or more races</b>                          | N/A          | N/A          | N/A          | 5 (8.62)     |
|                                                                                                                                                            | <b>Unknown</b>                                    | N/A          | N/A          | N/A          | 4 (6.90)     |
|                                                                                                                                                            | <b>Other</b>                                      | N/A          | N/A          | N/A          | 0 (0)        |
| <b>Pre-existing Comorbidities (autoimmune disease, cancer, diabetes, hypertension, heart disease, lung disease, kidney disease, liver disease) (n (%))</b> | <b>No</b>                                         | N/A          | N/A          | N/A          | 12 (22.10)   |
|                                                                                                                                                            | <b>Yes</b>                                        | N/A          | N/A          | N/A          | 45 (77.59)   |
| <b>BMI (Median (IQR))</b>                                                                                                                                  |                                                   | 27.00 (9.25) | 28.50 (7.00) | N/A          | 26.96 (6.89) |
| <b>Hospitalized during acute COVID-19 illness (n (%))</b>                                                                                                  | <b>Nonhospitalized</b>                            | N/A          | 0 (0)        | N/A          | 46 (79.31)   |
|                                                                                                                                                            | <b>Hospitalized</b>                               | N/A          | 30 (100.00)  | N/A          | 12 (20.69)   |

**Table S3. Clinical characteristics of the UNCOVR cohort, Related to Figure 1**

|                                  |                               | UNCOVR cohort |
|----------------------------------|-------------------------------|---------------|
| <b>N (individuals, samples)</b>  |                               | 27, 76        |
| <b>Age (years; median (IQR))</b> |                               | 57 (20.5)     |
| <b>Sex (n (%))</b>               | <b>Male</b>                   | 11(40.7)      |
|                                  | <b>Female</b>                 | 16 (59.3)     |
| <b>Race (n (%))</b>              | <b>White</b>                  | 27 (100)      |
| <b>BMI (median (IQR))</b>        |                               | 29(4.6)       |
| <b>Ethnicity (n (%))</b>         | <b>Not Hispanic or Latino</b> | 25(92.6)      |
|                                  | <b>Unknown / Not Reported</b> | 2(7.4)        |

Table S4. Clinical characteristics of the UCSF LIINC and Rush PASC cohorts, Related to Figure 1

|                                                                                                                                                            |                                         | UCSF LIINC cohort |             | Rush PASC cohort   |            |
|------------------------------------------------------------------------------------------------------------------------------------------------------------|-----------------------------------------|-------------------|-------------|--------------------|------------|
|                                                                                                                                                            |                                         | No PASC           | PASC        | SARS-CoV2 negative | PASC       |
| <b>N</b>                                                                                                                                                   |                                         | 56                | 61          | 50                 | 50         |
| <b>Age (years; median (IQR))</b>                                                                                                                           |                                         | 49 (19.5)         | 49 (19)     | 43 (11.8)          | 45 (18)    |
| <b>Sex (n (%))</b>                                                                                                                                         | <b>Male</b>                             | 33 (55%)          | 27 (45%)    | 19 (38%)           | 19 (38)    |
|                                                                                                                                                            | <b>Female</b>                           | 23 (40%)          | 34 (60%)    | 31 (62%)           | 31 (62)    |
| <b>Race/ethnicity (n (%))</b>                                                                                                                              | <b>Asian</b>                            | 8 (73%)           | 3 (27%)     | 0 (0%)             | 0 (0%)     |
|                                                                                                                                                            | <b>Black</b>                            | 3 (50%)           | 3 (50%)     | 26 (52%)           | 7 (14)     |
|                                                                                                                                                            | <b>Hispanic/Latino</b>                  | 9 (31%)           | 20 (69%)    | 5 (10%)            | 9 (18)     |
|                                                                                                                                                            | <b>White</b>                            | 31 (48%)          | 34 (52%)    | 0 (0%)             | 34 (68)    |
|                                                                                                                                                            | <b>Pacific Islander/Native Hawaiiin</b> | 2 (67%)           | 1 (33%)     | 19 (38%)           | 0 (0%)     |
| <b>Pre-existing Comorbidities (autoimmune disease, cancer, diabetes, hypertension, heart disease, lung disease, kidney disease, liver disease) (n (%))</b> | <b>No</b>                               | 31 (51%)          | 30 (49%)    | N/A                | N/A        |
|                                                                                                                                                            | <b>Yes</b>                              | 25 (45%)          | 31 (55%)    | N/A                | N/A        |
| <b>BMI (Median (IQR))</b>                                                                                                                                  |                                         | 26.14 (7.25)      | 30.94 (9.9) | 34.9 (4.9)         | 28.7 (7.2) |
| <b>Hospitalization during acute COVID-19 illness (n (%))</b>                                                                                               | <b>Nonhospitalized</b>                  | 47 (51%)          | 46 (49%)    | N/A                | 38 (76)    |
|                                                                                                                                                            | <b>Hospitalized</b>                     | 9 (37.5%)         | 15 (62.5%)  | N/A                | 12 (24)    |

**Table S5. Clinical characteristics of the systemic viral infection cohort, Related to Figure 2**

|                                  |                                                   | <b>Healthy</b> | <b>Viral infection</b> |
|----------------------------------|---------------------------------------------------|----------------|------------------------|
| <b>N</b>                         |                                                   | 20             | 33                     |
| <b>Age (years; median (IQR))</b> |                                                   | 37 (21.00)     | 61.97 (15.19)          |
| <b>Sex (n (%))</b>               | <b>Male</b>                                       | 6 (30.00)      | 19 (58.82)             |
|                                  | <b>Female</b>                                     | 14 (70.00)     | 14 (41.18)             |
| <b>Race/ethnicity (n (%))</b>    | <b>Asian</b>                                      | 0 (0)          | 0 (0)                  |
|                                  | <b>Black</b>                                      | 4 (20.0)       | 10 (30.3)              |
|                                  | <b>Hispanic/Latino</b>                            | 0 (0)          | 0 (0)                  |
|                                  | <b>White</b>                                      | 16 (80.0)      | 23 (69.7)              |
|                                  | <b>Native Hawaiian and Other Pacific Islander</b> | 0 (0)          | 0 (0)                  |
|                                  | <b>American Indian and/or Alaska Native</b>       | 0 (0)          | 0 (0)                  |
|                                  | <b>Two or more races</b>                          | 0 (0)          | 0 (0)                  |
|                                  | <b>Unknown</b>                                    | 0 (0)          | 0 (0)                  |
|                                  | <b>Other</b>                                      | 0 (0)          | 0 (0)                  |
